# Supplementary material for: Eu2+-activated MgAl2Si4O6N4: a novel oxonitridoalumosilicate blue phosphor for white LEDs
Source: Royal Society of Chemistry journal article supplement (doi:10.1039/d2dt02718f), 2022-01-01
Supplement: d2dt02718f1.pdf [file d2dt02718f1.pdf]

## Supporting data

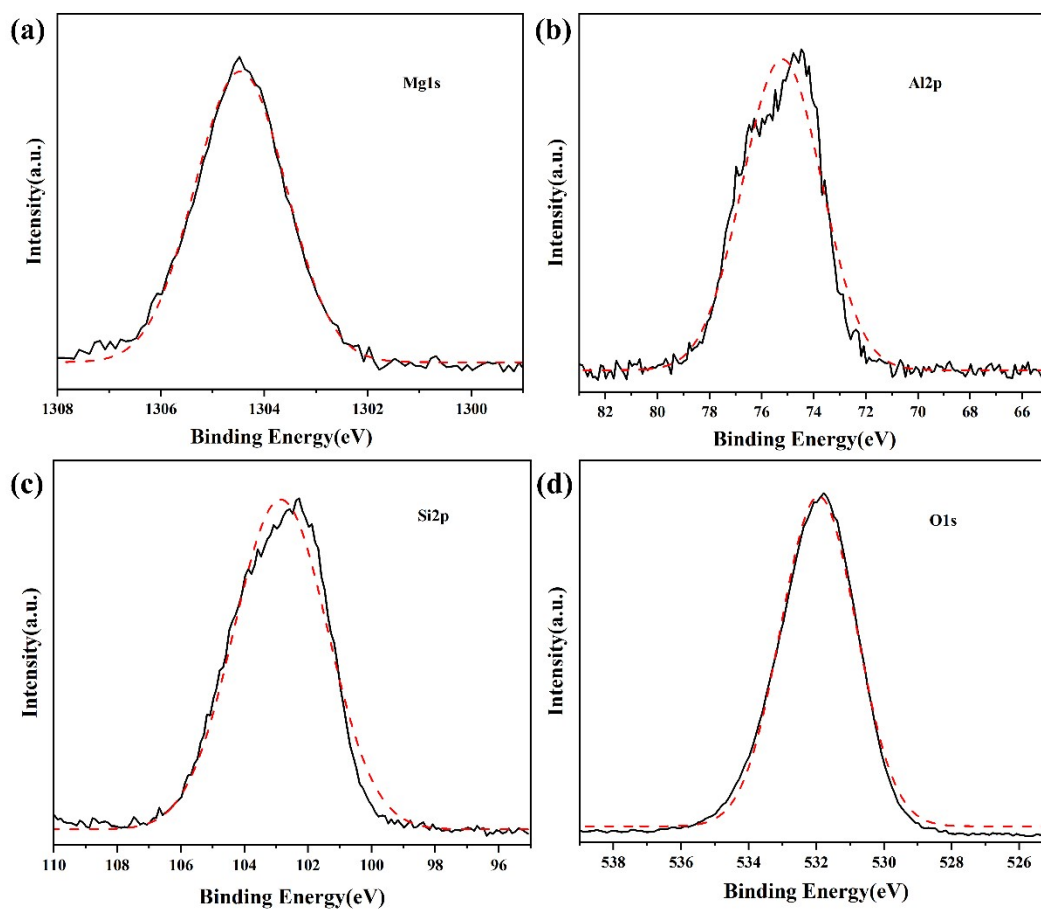

Fig. S1 The high resolution XPS spectra of Mg 1s(a), Al 2p(b), Si 2p(c) and O 1s(d).

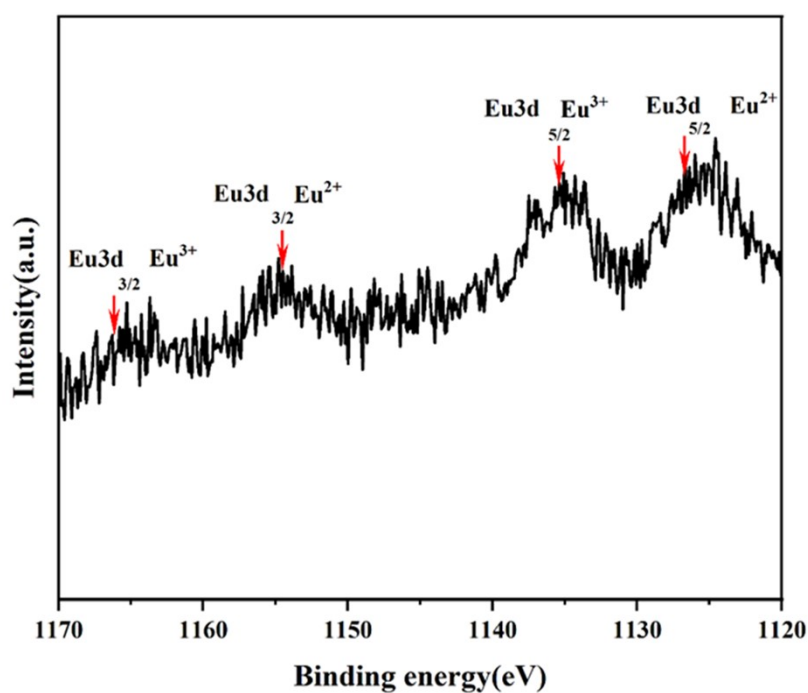

Fig. S2 The high-resolution XPS spectra of Eu 3d

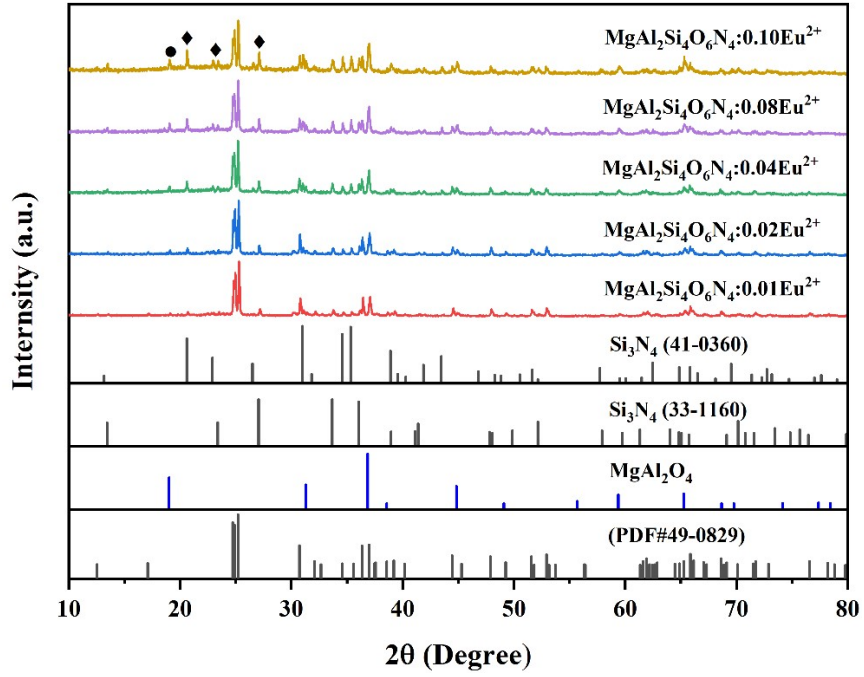

Fig. S3 The impurity phases of MASON:Eu<sup>2+</sup>

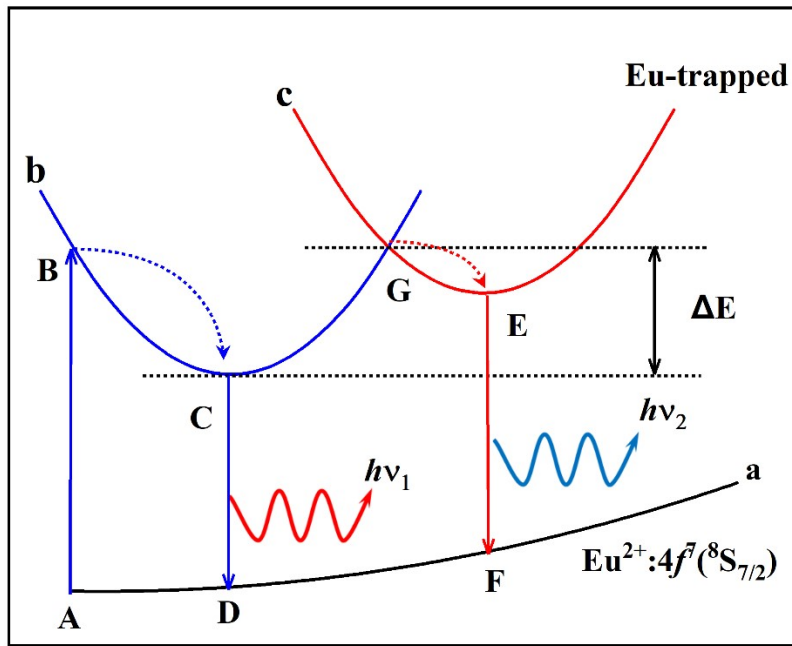

Fig. S4 The configuration coordinate diagram illustrating anomalous blue shift emitting

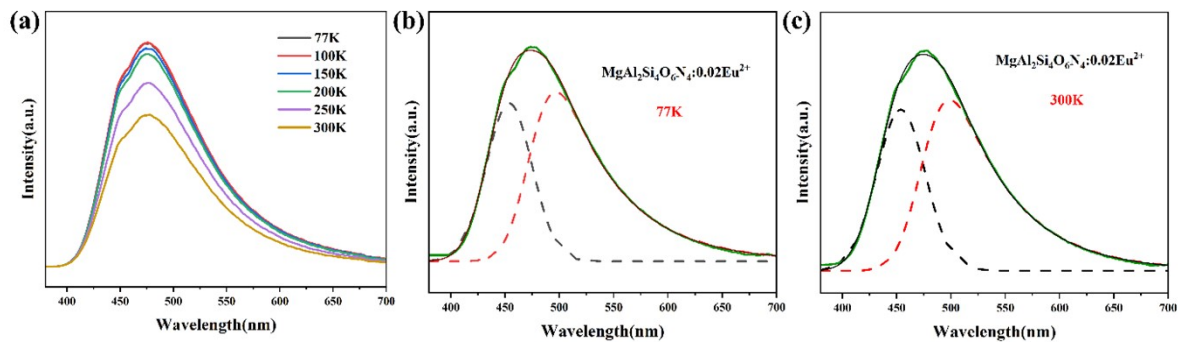

Fig. V4. (a) Temperature-dependent PL spectra of  $\text{MgAl}_2\text{Si}_4\text{O}_6\text{N}_4:0.02\text{Eu}^{2+}$  phosphor, and Gaussian peak separation of PL spectra of  $\text{MgAl}_2\text{Si}_4\text{O}_6\text{N}_4:0.02\text{Eu}^{2+}$  phosphor at 77k (b) and 300k (c)
